# Supplementary material for: Antibiotic-related gut dysbiosis induces lung immunodepression and worsens lung infection in mice
Source: Springer Nature journal article supplement (doi:10.1186/s13054-020-03320-8), 2020-10-15

### FSC / SSC

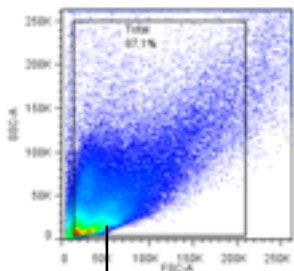

Total cells

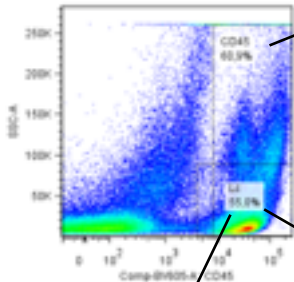

Lc / NK cells

Lc Tgd

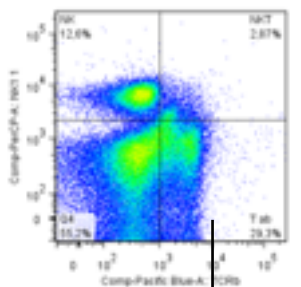

CD4<sup>+</sup> T cells

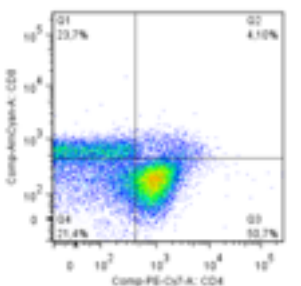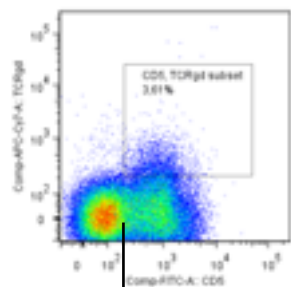

iNKT cells

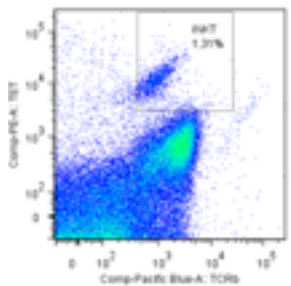

### CD45<sup>+</sup> Cells / Neutrophils

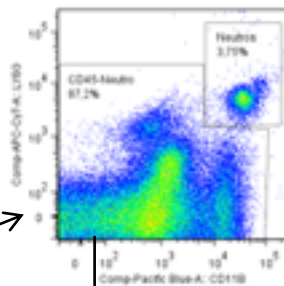

APC

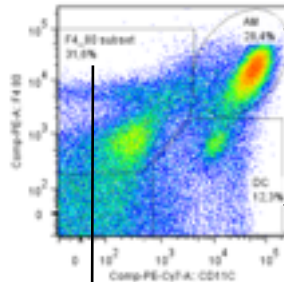

F4/80<sup>+</sup> cells

AM (Siglec F<sup>+</sup>)

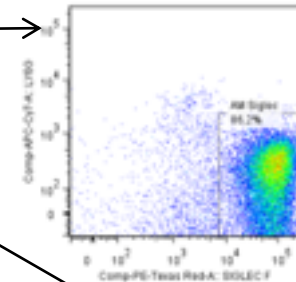

CD11c<sup>+</sup> cells

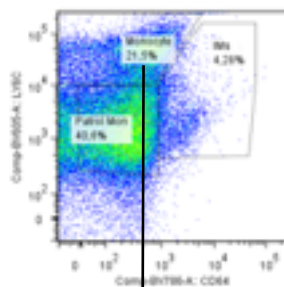

Inflammatory monocytes

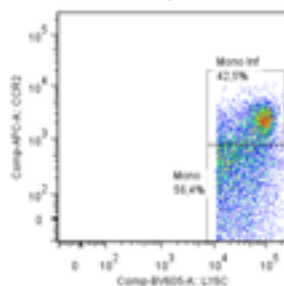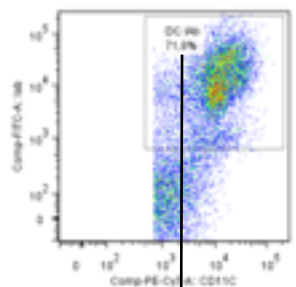

Dendritic cells

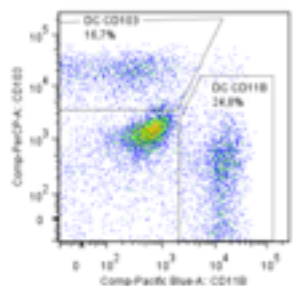

Supplement: MOESM1 [file 18500000]
