# Supplementary material for: Antibiotic-related gut dysbiosis induces lung immunodepression and worsens lung infection in mice
Source: Springer Nature journal article supplement (doi:10.1186/s13054-020-03320-8), 2020-10-15

# Stool 16SrDNA Fold decrease

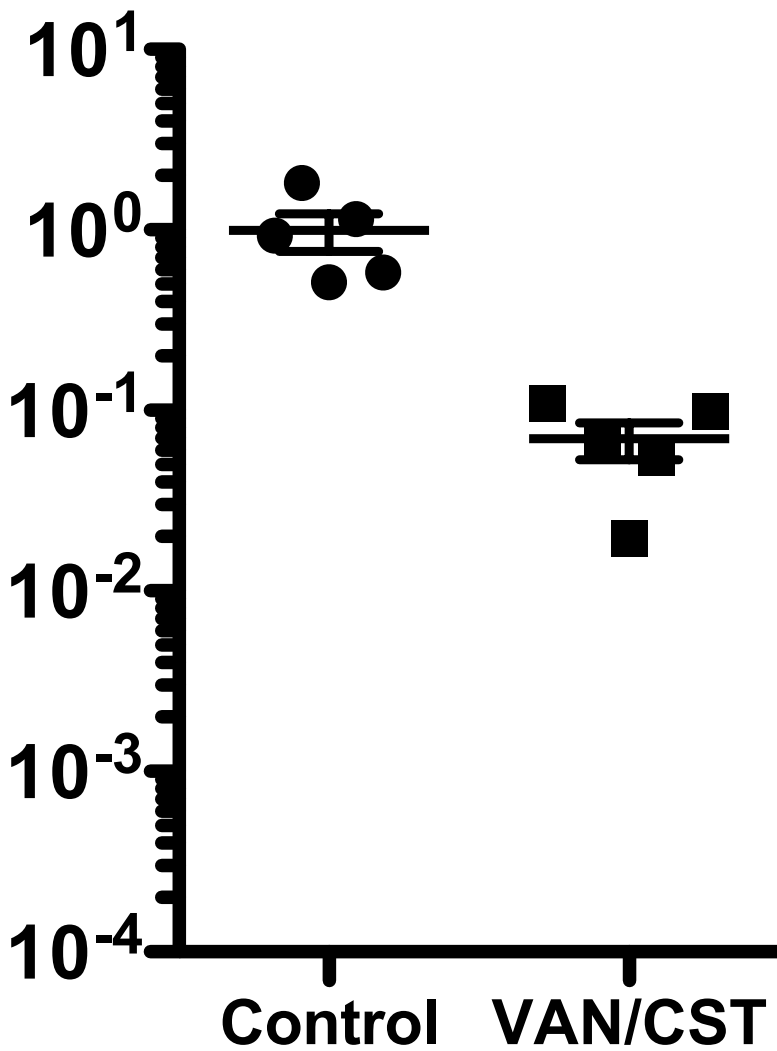

Supplement: MOESM2 [file 18500000]
